# Supplementary material
Source: PubMed Central journal article supplement (PMC8402948)
Supplement: NIHMS1711930-supplement-4.pdf [file NIHMS1711930-supplement-4.pdf]

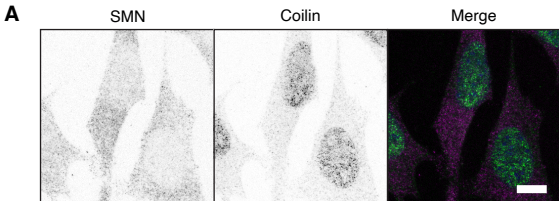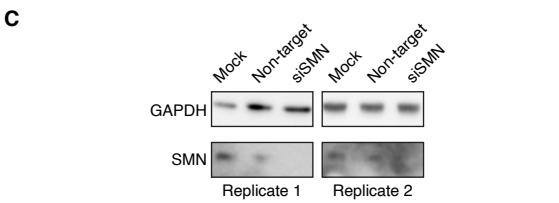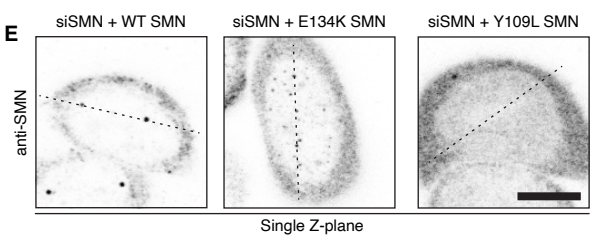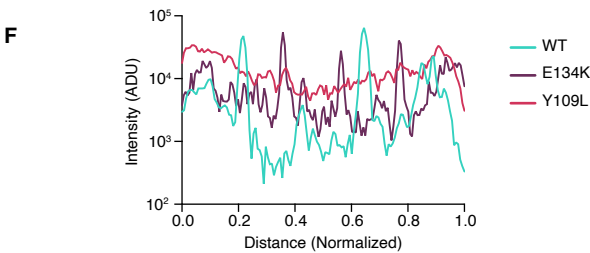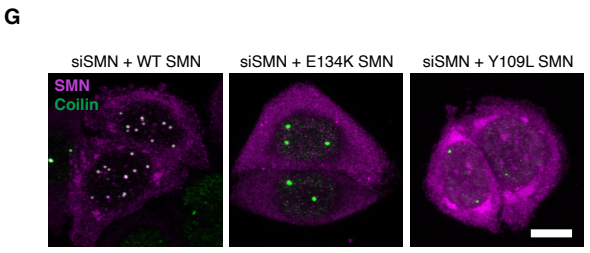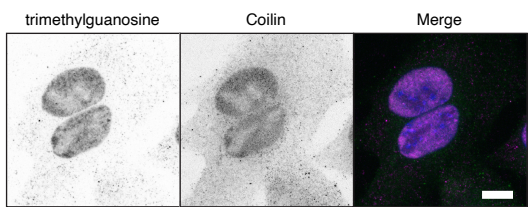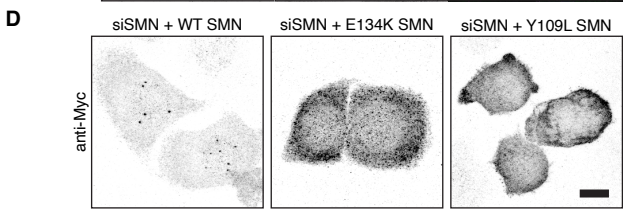

**H** Statistics Related to Figure 3B

| Number of Cells per Condition |    |
|-------------------------------|----|
| Non-target                    | 48 |
| siSMN                         | 73 |
| siSMN + WT                    | 67 |
| siSMN + E134K                 | 69 |
| siSMN + Y109L                 | 63 |

Kruskal-Wallis H test:  
 $p = 2.19e-12$

| Dunn's post hoc |           |          |            |               |
|-----------------|-----------|----------|------------|---------------|
| siSMN           | 1.134e-10 |          |            |               |
| siSMN + WT      | 1.189e-2  | 1.949e-5 |            |               |
| siSMN + E134K   | 3.159e-3  | 1.271e-4 | 0.645      |               |
| siSMN + Y109L   | 8.229e-10 | 0.899    | 6.520e-5   | 3.605e-4      |
| non-target      |           | siSMN    | siSMN + WT | siSMN + E134K |

Statistics Related to Figure 3C

Kruskal-Wallis H test:  
 $p = 9.33e-15$

| Dunn's post hoc |          |           |            |               |
|-----------------|----------|-----------|------------|---------------|
| siSMN           | 6.371e-9 |           |            |               |
| siSMN + WT      | 0.2746   | 1.570e-11 |            |               |
| siSMN + E134K   | 2.141e-5 | 4.349e-4  | 2.018e-9   |               |
| siSMN + Y109L   | 0.679    | 6.304e-7  | 0.181      | 3.296e-3      |
| non-target      |          | siSMN     | siSMN + WT | siSMN + E134K |
