# Supplementary material
Source: PubMed Central journal article supplement (PMC8402948)
Supplement: NIHMS1711930-supplement-11.pdf [file NIHMS1711930-supplement-11.pdf]

**Table S1. Constructs used in this study; Related to STAR Methods.**

| <b>Construct</b>               | <b>Uniprot ID</b> | <b>Insert Sequence</b> | <b>Backbone</b>       | <b>Promoter</b> |
|--------------------------------|-------------------|------------------------|-----------------------|-----------------|
| mCh-Cry2                       | N/A               | None                   | pHR_SFFV-mCherry-Cry2 | SFFV            |
| FUS <sup>IDR</sup>             | P35637            | aa 1-214               | pHR_SFFV-mCherry-Cry2 | SFFV            |
| hnRNPA1 <sup>IDR</sup>         | P09651            | aa 186-320             | pHR_SFFV-mCherry-Cry2 | SFFV            |
| SMN-Cry2                       | Q16637            | aa 1-294               | pHR_SFFV-mCherry-Cry2 | SFFV            |
| SMN <sup>IDR-N</sup>           | Q16637            | aa 1-91                | pHR_SFFV-mCherry-Cry2 | SFFV            |
| SMN <sup>Tud</sup>             | Q16637            | aa 92-145              | pHR_SFFV-mCherry-Cry2 | SFFV            |
| SMN <sup>IDR-C</sup>           | Q16637            | aa 146-294             | pHR_SFFV-mCherry-Cry2 | SFFV            |
| <i>dm</i> Tudor <sup>Tud</sup> | P25823            | aa 2315-2515           | pHR_SFFV-mCherry-Cry2 | SFFV            |
| Aub3                           | O76922            | 3x(NPVIARGRGRGRK)      | pLV-EGFP              | eIF4a           |
| Aub3(KG)                       | O76922            | 3x(NPVIAKGKGKGGK)      | pLV-EGFP              | eIF4a           |
| Spf30 <sup>Tud</sup>           | O75940            | 72-132                 | pHR_SFFV-mCherry-Cry2 | SFFV            |
| Tdrd1 <sup>Tud</sup> #2        | O9BXT4            | 541-600                | pHR_SFFV-mCherry-Cry2 | SFFV            |
| Tdrd1 <sup>Tud</sup> #3        | O9BXT4            | 762-821                | pHR_SFFV-mCherry-Cry2 | SFFV            |
| Tdrd1 <sup>Tud</sup> #4        | O9BXT4            | 990-1048               | pHR_SFFV-mCherry-Cry2 | SFFV            |
| Tdrd3 <sup>Tud</sup>           | Q9H7E2            | 555-615                | pHR_SFFV-mCherry-Cry2 | SFFV            |
| Tdrd4 <sup>Tud</sup> #1        | Q9BXT8            | 726-784                | pHR_SFFV-mCherry-Cry2 | SFFV            |
| Tdrd4 <sup>Tud</sup> #4        | Q9BXT8            | 1479-1539              | pHR_SFFV-mCherry-Cry2 | SFFV            |
| Tdrd6 <sup>Tud</sup> #5        | O60522            | 1033-1088              | pHR_SFFV-mCherry-Cry2 | SFFV            |
| Tdrd6 <sup>Tud</sup> #6        | O60522            | 1352-1411              | pHR_SFFV-mCherry-Cry2 | SFFV            |
| Tdrd8 <sup>Tud</sup>           | Q9BXU1            | 78-137                 | pHR_SFFV-mCherry-Cry2 | SFFV            |

|                       |                  |                                                                                                                                                                                                                                                                                                                                                                                                                                                                                                                                                                                                                                                                                                                                                                                                                                                                                                                                                                                                                                                 |                       |      |
|-----------------------|------------------|-------------------------------------------------------------------------------------------------------------------------------------------------------------------------------------------------------------------------------------------------------------------------------------------------------------------------------------------------------------------------------------------------------------------------------------------------------------------------------------------------------------------------------------------------------------------------------------------------------------------------------------------------------------------------------------------------------------------------------------------------------------------------------------------------------------------------------------------------------------------------------------------------------------------------------------------------------------------------------------------------------------------------------------------------|-----------------------|------|
| Tdrd9 <sup>Tud</sup>  | Q8NDG6           | 944-1004                                                                                                                                                                                                                                                                                                                                                                                                                                                                                                                                                                                                                                                                                                                                                                                                                                                                                                                                                                                                                                        | pHR_SFFV-mCherry-Cry2 | SFFV |
| Snd1 <sup>Tud</sup>   | Q7KZF4           | 729-787                                                                                                                                                                                                                                                                                                                                                                                                                                                                                                                                                                                                                                                                                                                                                                                                                                                                                                                                                                                                                                         | pHR_SFFV-mCherry-Cry2 | SFFV |
| Recoded WT SMN-Myc    | Q16637           | 1-294                                                                                                                                                                                                                                                                                                                                                                                                                                                                                                                                                                                                                                                                                                                                                                                                                                                                                                                                                                                                                                           | pEGFP-N1              | CMV  |
|                       | <i>Sequence:</i> | ATGGCCATGTCTTCCGGAGGCTCTGGCGGCGGGGTCCC<br>TGAGCAGGAAGATAGTGTACTCTTCCGAAGGGGCACA<br>GGGCAATCAGACGATTCTGACATCTGGGATGACACTGC<br>GCTTATCAAAGCATAACGACAAGGCCGTTGCCAGCTTTA<br>AACATGCTCTGAAAAATGGCGATATCTGTGAGACATCC<br>GGCAAACCGAAGACCACTCCAAAGCGGAAGCCCGCCA<br>AGAAGAACAAGTCACAGAAGAAGAACACGGCAGCTTC<br>ACTGCAACAGTGGAAAGTGGGTGATAAGTGTTCCGCC<br>ATCTGGTCAGAAGATGGCTGCATCTATCCTGCTACCAT<br>TGCGAGTATCGACTTCAAAGAGAAACCTGCGTGGTC<br>GTTTACACAGGATACGGTAATCGTGAAGAGCAGAATC<br>TCTCCGATCTGCTGAGTCCAATTTGTGAGGTGGCAAAC<br>AATATAGAACAGAATGCCAGGAGAACGAGAACGAAA<br>GCCAAGTGAGCACCGATGAGTCCGAGAACAGTAGGAG<br>CCCGGGAAACAAATCAGACAATATCAAACCTAAGAGC<br>GCACCCTGGAACAGCTTTTTACCCCTCCACCACCAAT<br>GCCAGGGCCCCGCTTGGGCCCTGGGAAGCCTGGACTG<br>AAATTCAATGGACCACCTCCACCTCCTCCGCCTCCACC<br>TCCGCACCTTCTCTCTTGCTGGCTCCCACCTTTTCCATC<br>GGGGCCACCTATAATACCTCCACCTCCACCTATTTGTC<br>CCGACAGCCTAGATGACGCCGACGCTTTAGGCTCCATG<br>CTGATTTCTGGTATATGTCTGGTTATCACACTGGATAT<br>TACATGGGTTTCCGGCAGAATCAGAAGGAAGGGAGAT<br>GCAGCCATAGTTTGAACGAGCAGAACTGATTTCTGAG<br>GAAGACCTGTGA |                       |      |
| Recoded E134K SMN-Myc | Q16637           | 1-294 (E134K)                                                                                                                                                                                                                                                                                                                                                                                                                                                                                                                                                                                                                                                                                                                                                                                                                                                                                                                                                                                                                                   | pEGFP-N1              | CMV  |
|                       | <i>Sequence:</i> | ATGGCCATGTCTTCCGGAGGCTCTGGCGGCGGGGTCCC<br>TGAGCAGGAAGATAGTGTACTCTTCCGAAGGGGCACA<br>GGGCAATCAGACGATTCTGACATCTGGGATGACACTGC<br>GCTTATCAAAGCATAACGACAAGGCCGTTGCCAGCTTTA<br>AACATGCTCTGAAAAATGGCGATATCTGTGAGACATCC<br>GGCAAACCGAAGACCACTCCAAAGCGGAAGCCCGCCA<br>AGAAGAACAAGTCACAGAAGAAGAACACGGCAGCTTC<br>ACTGCAACAGTGGAAAGTGGGTGATAAGTGTTCCGCC<br>ATCTGGTCAGAAGATGGCTGCATCTATCCTGCTACCAT                                                                                                                                                                                                                                                                                                                                                                                                                                                                                                                                                                                                                                                             |                       |      |

TGCGAGTATCGACTTCAAAGAGAAACCTGCGTGGTC  
GTTTACACAGGATACGGTAATCGTAAGGAGCAGAATC  
TCTCCGATCTGCTGAGTCCAATTTGTGAGGTGGCAAAC  
AATATAGAACAGAATGCCCAGGAGAACGAGAACGAAA  
GCCAAGTGAGCACCGATGAGTCCGAGAACAGTAGGAG  
CCCGGGAAACAAATCAGACAATATCAAACCTAAGAGC  
GCACCCTGGAACAGCTTTTTACCCCCTCCACCACCAAT  
GCCAGGGCCCCGCTTGGGCCCTGGGAAGCCTGGACTG  
AAATTCAATGGACCACCTCCACCTCCTCCGCCTCCACC  
TCCGCACCTTCTCTCTTGCTGGCTCCCACCTTTTCCATC  
GGGGCCACCTATAATACCTCCACCTCCACCTATTTGTC  
CCGACAGCCTAGATGACGCCGACGCTTTAGGCTCCATG  
CTGATTTCTGTTATATGTCTGGTTATCACACTGGATAT  
TACATGGGTTTCCGGCAGAATCAGAAGGAAGGGAGAT  
GCAGCCATAGTTTGAACGAGCAGAACTGATTTCTGAG  
GAAGACCTGTGA

|                             |        |               |          |     |
|-----------------------------|--------|---------------|----------|-----|
| Recoded<br>Y109L<br>SMN-Myc | Q16637 | 1-294 (Y109L) | pEGFP-N1 | CMV |
|-----------------------------|--------|---------------|----------|-----|

*Sequence:* ATGGCCATGTCTTCCGGAGGCTCTGGCGGCGGGGTCCC  
TGAGCAGGAAGATAGTGTACTCTTCCGAAGGGGCACA  
GGCAATCAGACGATTCTGACATCTGGGATGACACTGC  
GCTTATCAAAGCATAACGACAAGGCCGTTGCCAGCTTTA  
AACATGCTCTGAAAAATGGCGATATCTGTGAGACATCC  
GGCAAACCGAAGACCACTCCAAAGCGGAAGCCCGCCA  
AGAAGAACAAGTCACAGAAGAAGAACACGGCAGCTTC  
ACTGCAACAGTGGAAAGTGGGTGATAAGTGTTCGCC  
ATCTGGTCAGAAGATGGCTGCATCTTACCTGCTACCAT  
TGCGAGTATCGACTTCAAAGAGAAACCTGCGTGGTC  
GTTTACACAGGATACGGTAATCGTGAAGAGCAGAATC  
TCTCCGATCTGCTGAGTCCAATTTGTGAGGTGGCAAAC  
AATATAGAACAGAATGCCCAGGAGAACGAGAACGAAA  
GCCAAGTGAGCACCGATGAGTCCGAGAACAGTAGGAG  
CCCGGGAAACAAATCAGACAATATCAAACCTAAGAGC  
GCACCCTGGAACAGCTTTTTACCCCCTCCACCACCAAT  
GCCAGGGCCCCGCTTGGGCCCTGGGAAGCCTGGACTG  
AAATTCAATGGACCACCTCCACCTCCTCCGCCTCCACC  
TCCGCACCTTCTCTCTTGCTGGCTCCCACCTTTTCCATC  
GGGGCCACCTATAATACCTCCACCTCCACCTATTTGTC  
CCGACAGCCTAGATGACGCCGACGCTTTAGGCTCCATG  
CTGATTTCTGTTATATGTCTGGTTATCACACTGGATAT  
TACATGGGTTTCCGGCAGAATCAGAAGGAAGGGAGAT  
GCAGCCATAGTTTGAACGAGCAGAACTGATTTCTGAG  
GAAGACCTGTGA

**Table S2. Antibodies used in this study; Related to STAR Methods.**

| Name                                                                          | Epitope    | Source                                | Application & Dilution  |
|-------------------------------------------------------------------------------|------------|---------------------------------------|-------------------------|
| mCherry Antibody                                                              | mCherry    | Invitrogen (#PA5-34974)               | WB (1:2000), IF (1:500) |
| Coilin (H-300)                                                                | Coilin     | Santa Cruz Biotechnology (#sc-32860)  | IF (1:200)              |
| Coilin (replacement for discontinued H-300)                                   | Coilin     | Abcam (#ab210785)                     | IF (1:800)              |
| SYM10                                                                         | sDMA       | Millipore Sigma (#07-412)             | WB (1:1000), IF (1:100) |
| SYM11                                                                         | sDMA       | Millipore Sigma (#07-413)             | WB (1:1000)             |
| ASYM24                                                                        | aDMA       | Millipore Sigma (#07-414)             | WB (1:2000)             |
| SMN (2B1)                                                                     | SMN        | Abcam (#ab5831)                       | IF (1:200)              |
| Anti-green fluorescent protein, rabbit IgG fraction                           | GFP        | Invitrogen (#A11122)                  | WB (1:2000)             |
| GAPDH (FL-335)                                                                | GAPDH      | SantaCruz Biotechnology (#sc-25778)   | WB (1:2000)             |
| Y12                                                                           | Sm         | Gift from Joan Steitz                 | IF (1:10)               |
| Anti-2,2,7-Trimethylguanosine Mouse mAb (K121)                                | TMG        | Calbiochem (#NA02)                    | IF (1:200)              |
| Rb pAb to SNRPC                                                               | U1 snRNP-C | Abcam (#ab82862)                      | IF (1:200)              |
| CB7                                                                           | U1-70K     | Gift from Doug Black                  | IF (1:200)              |
| Anti-rabbit IgG Horseradish Peroxidase-Linked Species-Specific Whole Antibody | Rabbit IgG | GE HealthCare (#NA934)                | WB (1:10,000)           |
| Alexa Fluor 488-conjugated AffiniPure Donkey Anti-Rabbit IgG                  | Rabbit IgG | Jackson ImmunoResearch (#711-545-152) | IF (1:500)              |
| Alexa Fluor 488-conjugated AffiniPure Donkey Anti-Mouse IgG                   | Mouse IgG  | Jackson ImmunoResearch (#715-545-150) | IF (1:500)              |
| Anti-Mouse IgG – Atto 594                                                     | Mouse IgG  | Sigma (#76085)                        | IF (1:500)              |
| Anti-Rabbit IgG – Atto 594                                                    | Rabbit IgG | Sigma (#77671)                        | IF (1:500)              |
| Anti-Mouse IgG – Atto 647N                                                    | Mouse IgG  | Sigma (#50185)                        | IF (1:500)              |
| Anti-Rabbit IgG – Atto 647N                                                   | Rabbit IgG | Sigma (40839)                         | IF (1:500)              |

Abbreviations- WB: Western Blot, IF: Immunofluorescence
