# Supplementary material
Source: PubMed Central journal article supplement (PMC8402948)

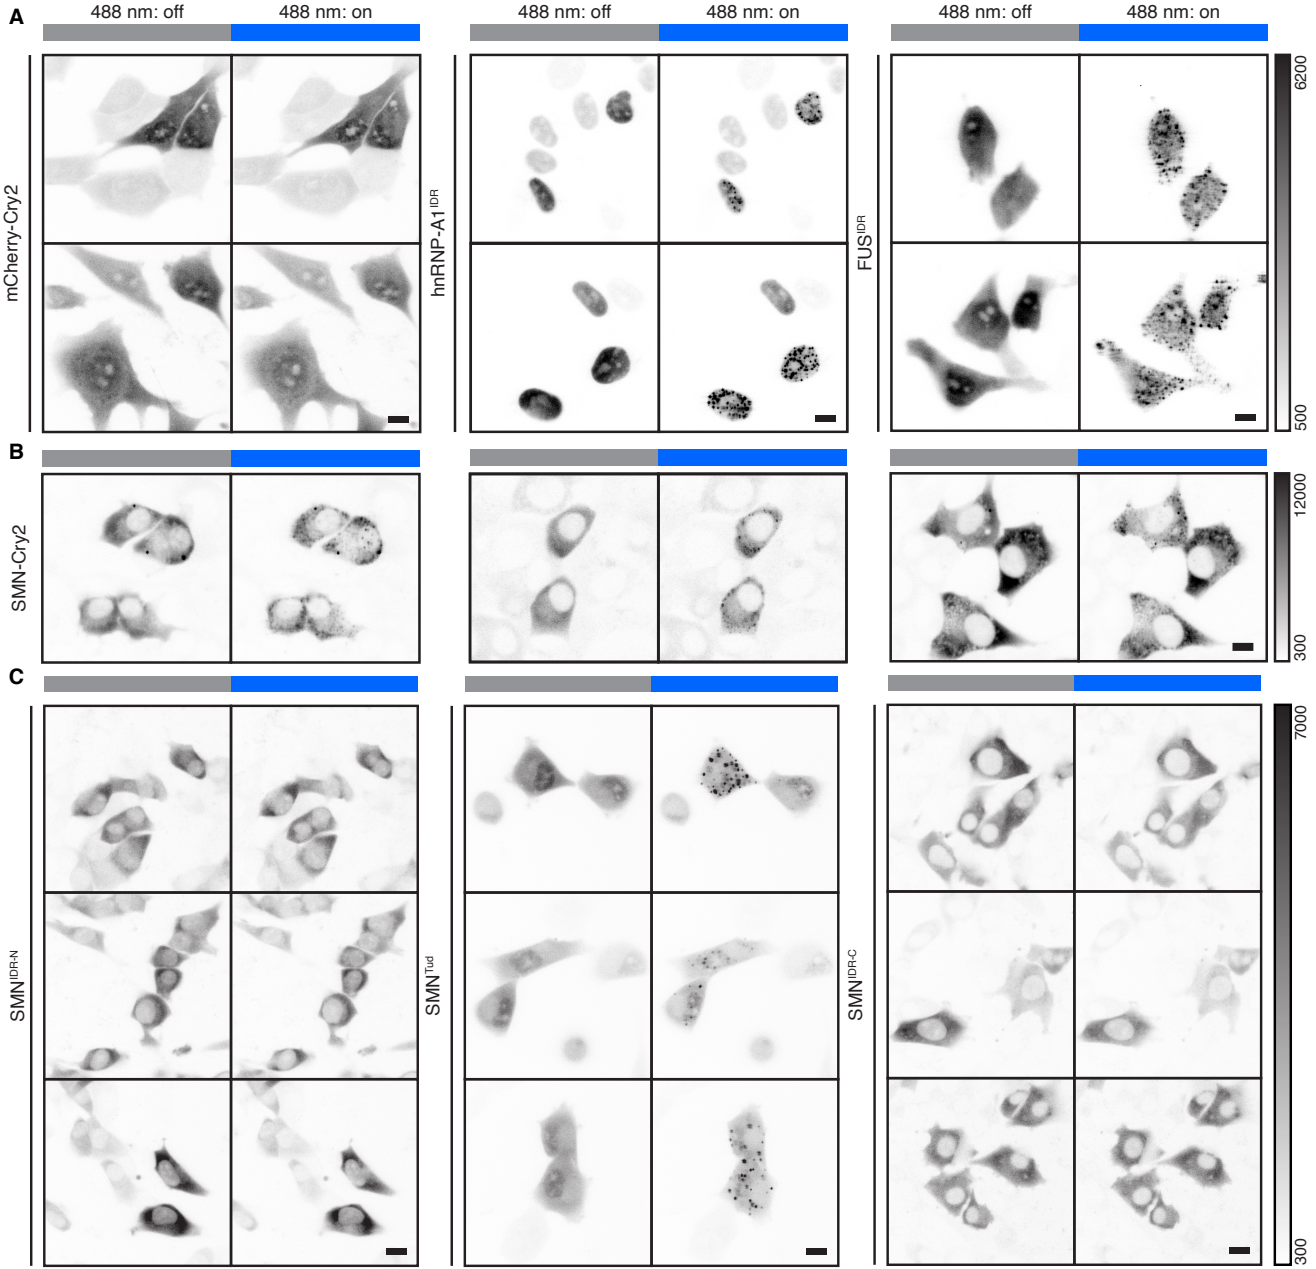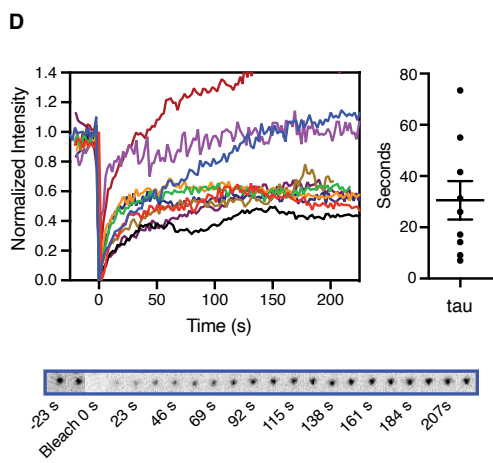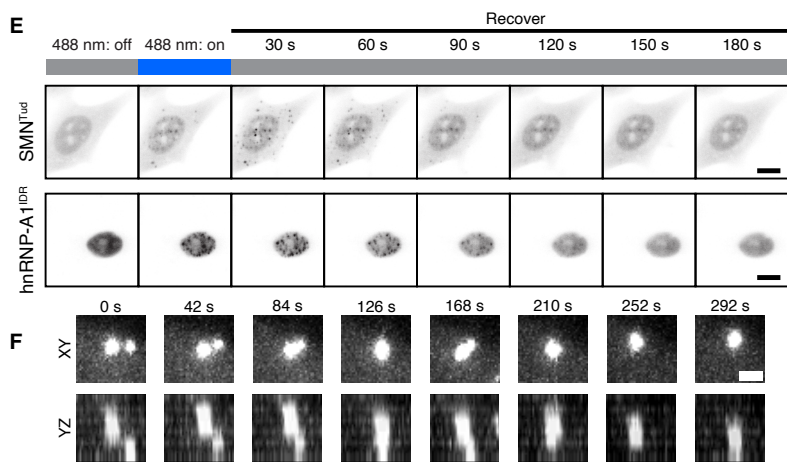

Supplement: NIHMS1711930-supplement-1.pdf [file NIHMS1711930-supplement-1.pdf]

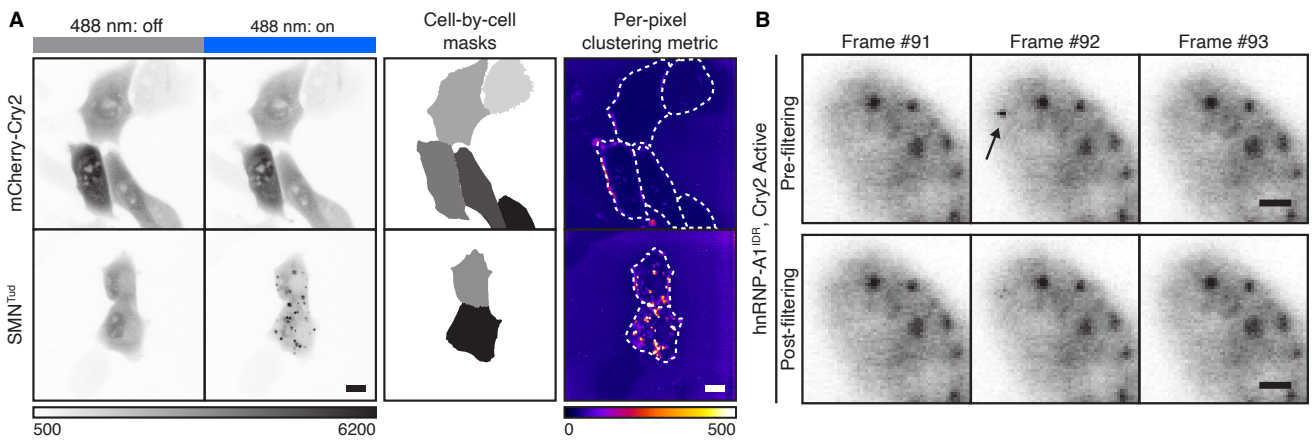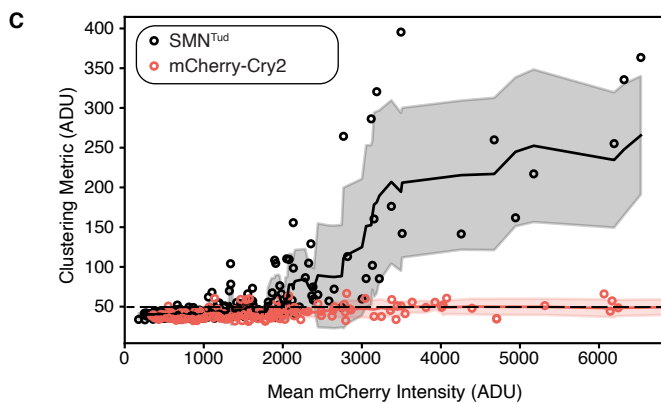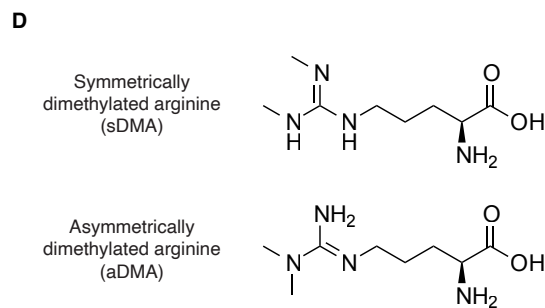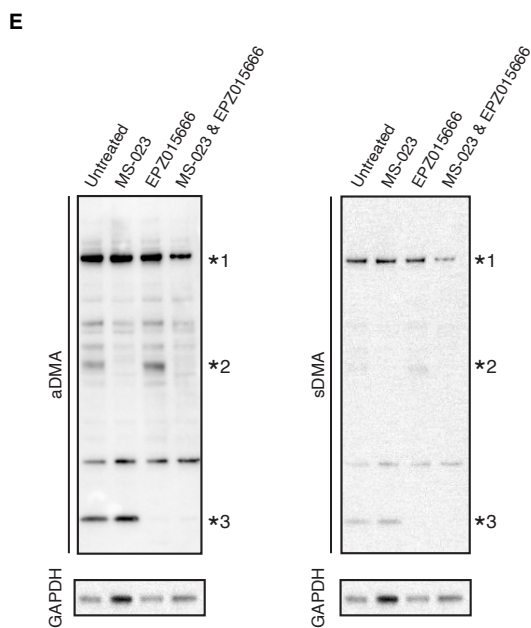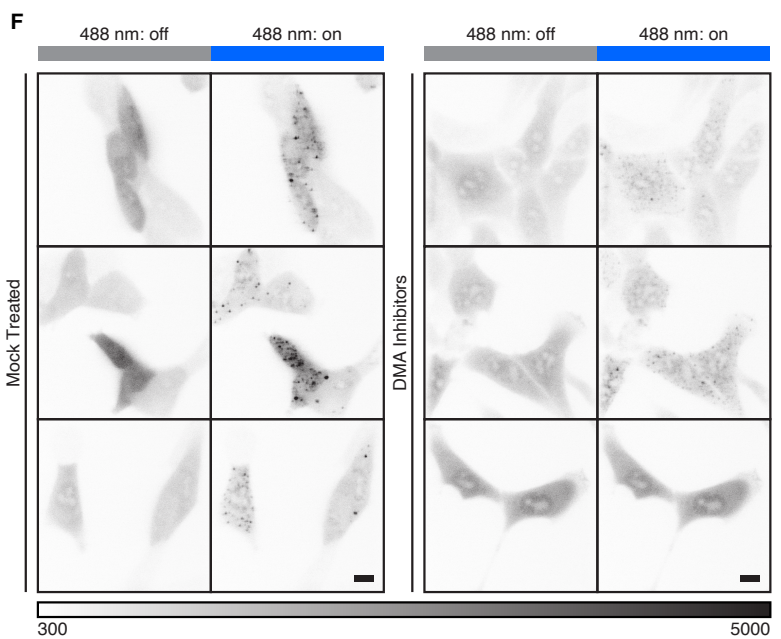

Supplement: NIHMS1711930-supplement-2.pdf [file NIHMS1711930-supplement-2.pdf]

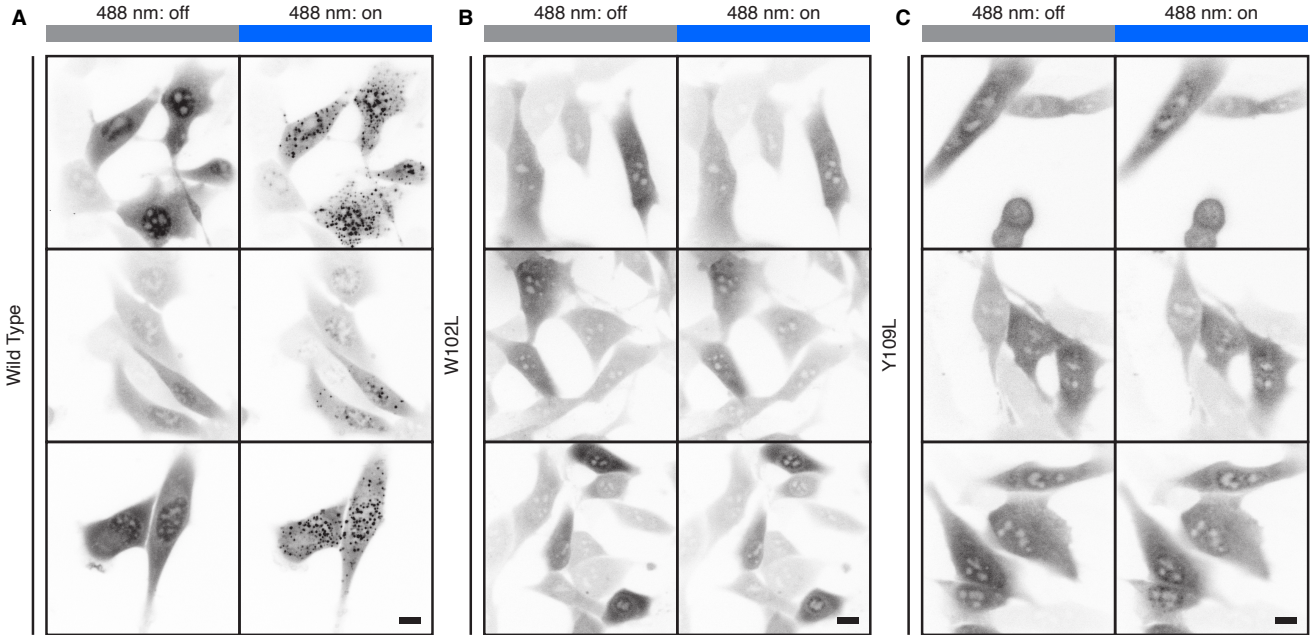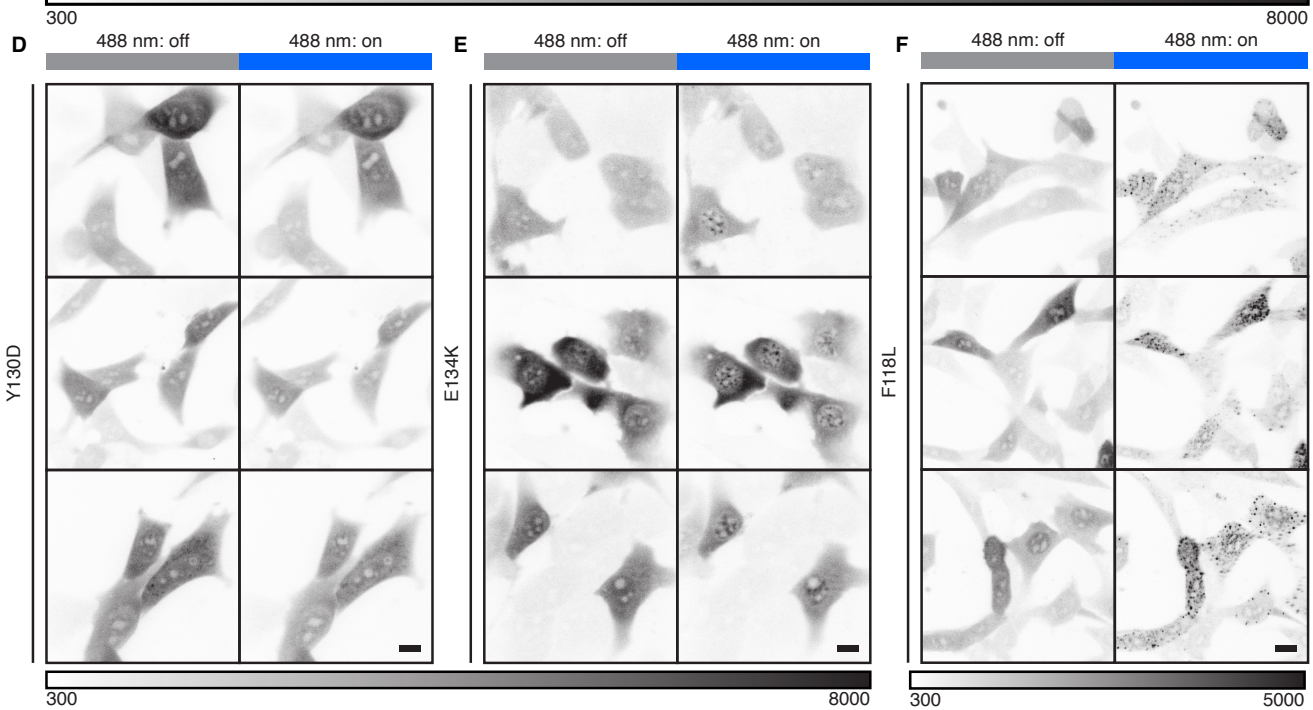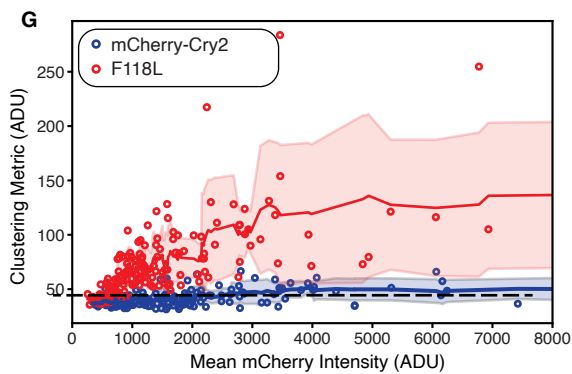

Supplement: NIHMS1711930-supplement-3.pdf [file NIHMS1711930-supplement-3.pdf]

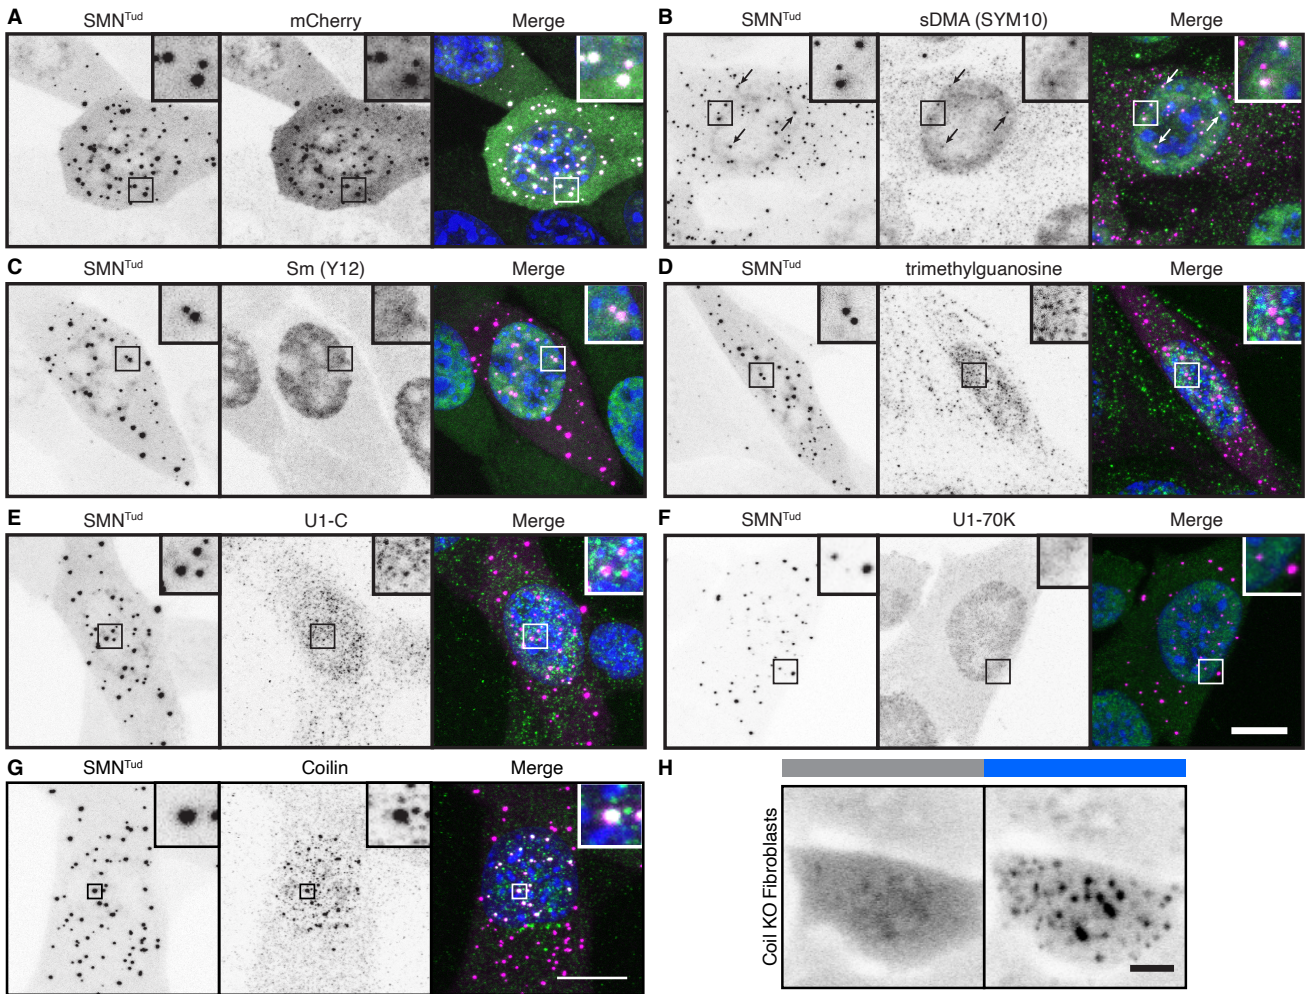

Supplement: NIHMS1711930-supplement-5.pdf [file NIHMS1711930-supplement-5.pdf]

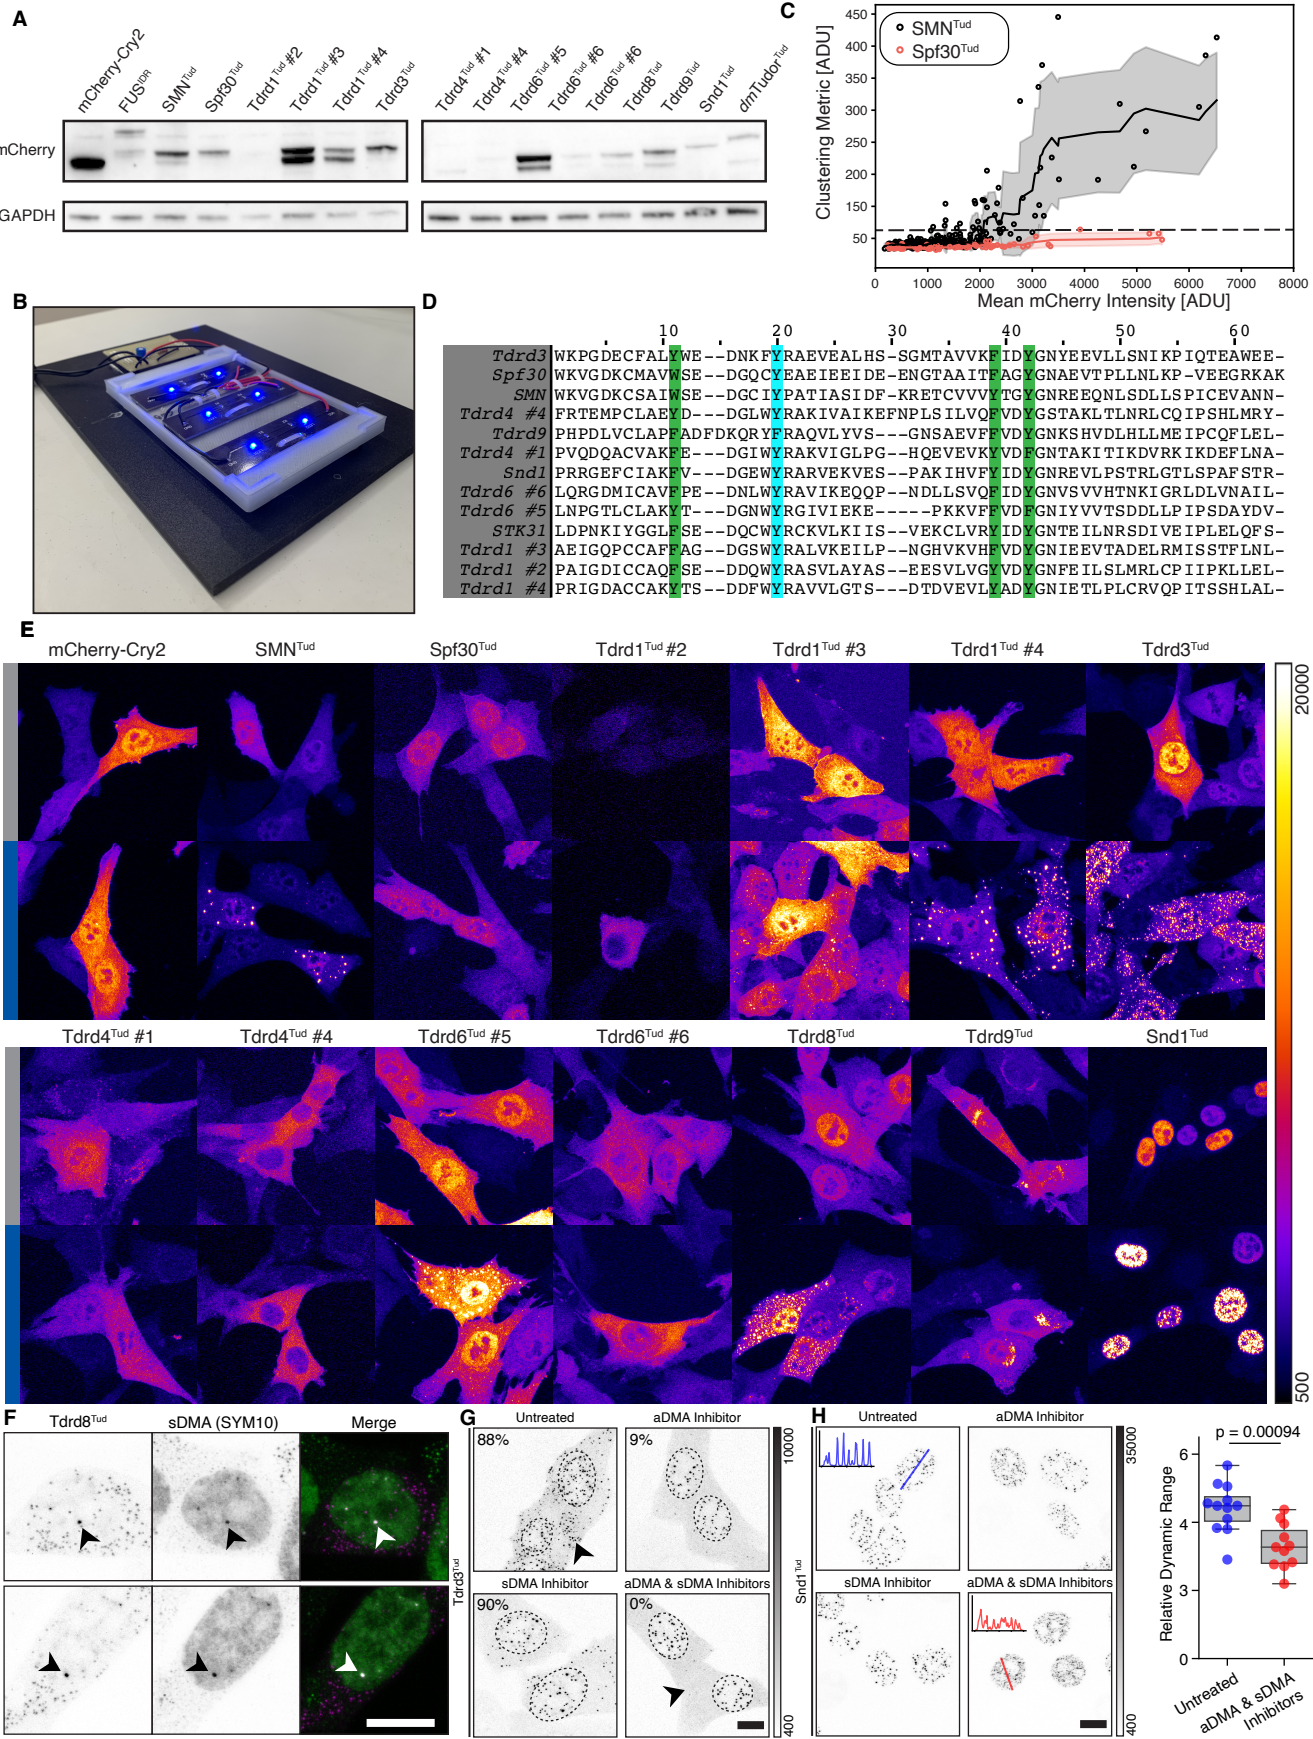

Supplement: NIHMS1711930-supplement-6.pdf [file NIHMS1711930-supplement-6.pdf]

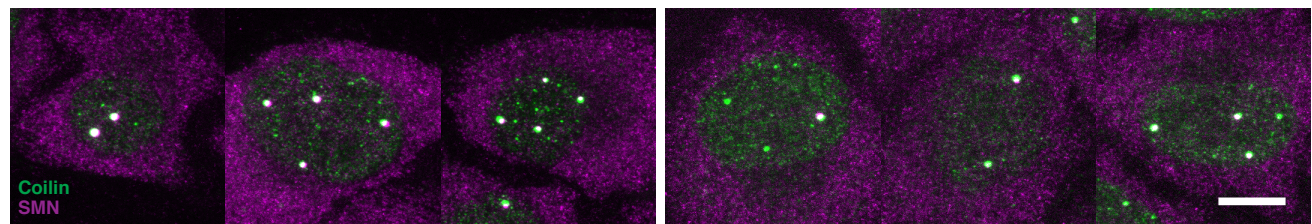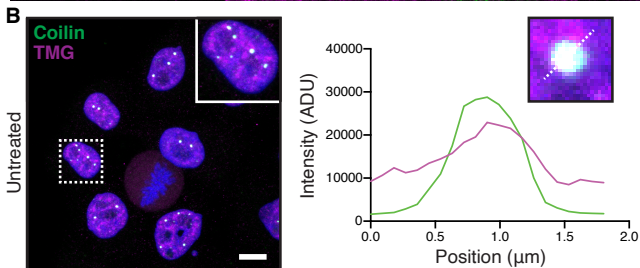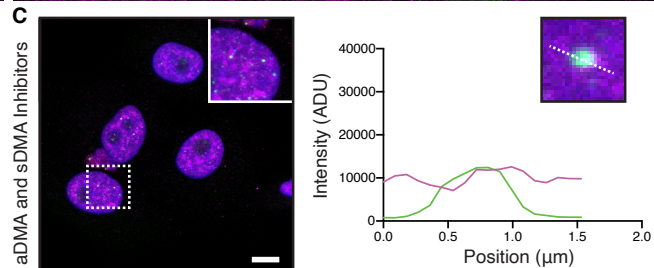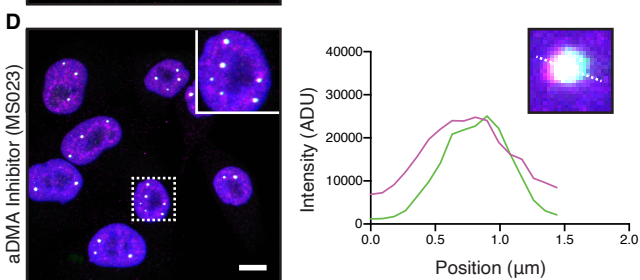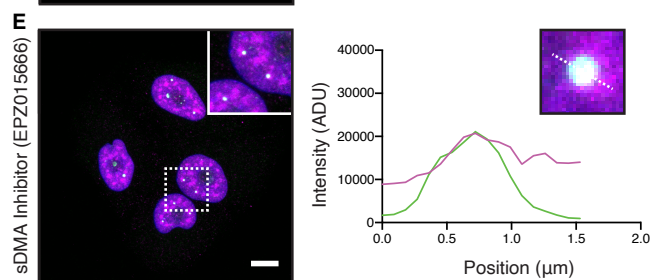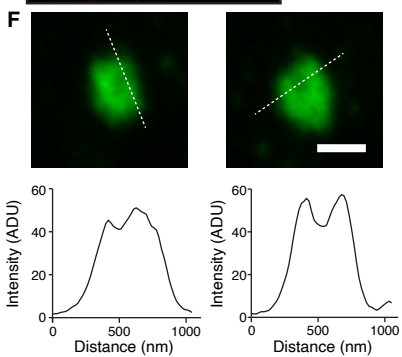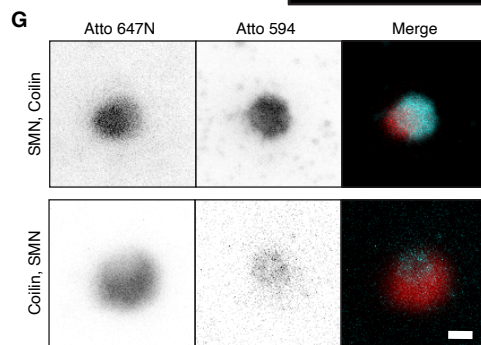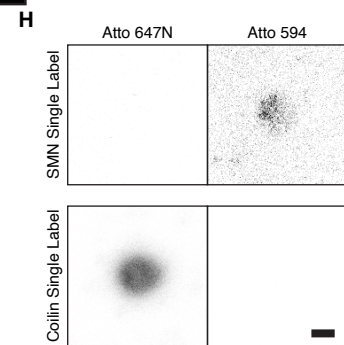

Supplement: NIHMS1711930-supplement-7.pdf [file NIHMS1711930-supplement-7.pdf]
